# Supplementary material
Source: publisher figshare collection journal article supplement (https://karger.figshare.com/ndownloader/files/27461438)
Supplement: Supplementary file 1 [file 27461438]

**Supplementary Figure Legends**

Supplementary Fig. 1. The summary of risk-of-bias for included studies.

Supplementary Fig. 2. Egger’s test for the publication bias of acupuncture. (a) Publication bias on pain; (b) Publication bias on incrustation time; (c) Publication bias on decrustation time; (d) Publication bias on the incidence of PHN.

Supplementary Fig. 3. Sensitivity analysis for the stability of acupuncture. (a) Stability on pain; (b) Stability on incrustation time; (c) Stability on decrustation time; (d) Stability on the incidence of PHN.
